# Supplementary material
Source: ML conference proceedings conference paper supplement (https://www.ecva.net/papers/eccv_2020/papers_ECCV/html/123590273_ECCV_2020_paper.php)
Supplement: Supplementary file 2 [file 123590273-supp.zip]

Archive with 7 entries (5 files):
- 2121-supp/
- 2121-supp/2121-supp.pdf
- 2121-supp/videos/
- 2121-supp/videos/BasketballDunk_good.mp4
- 2121-supp/videos/Billiards_wrong_GT; see 58-60s.mp4
- 2121-supp/videos/LongJump_good.mp4
- 2121-supp/videos/Shotput_challenging; see 63-68s.mp4
